# Supplementary material for: Lead-free perovskite Rb2Sn1−xTexCl6 with bright luminescence for optical thermometry and tunable white light emitting diodes
Source: Royal Society of Chemistry journal article supplement (doi:10.1039/d2tc02252d), 2022-01-01
Supplement: d2tc02252d1.pdf [file d2tc02252d1.pdf]

---

## Supporting Information

### **Lead-free perovskite $\text{Rb}_2\text{Sn}_{1-x}\text{Te}_x\text{Cl}_6$ with bright luminescence for optical thermometry and tunable white light emitting diodes**

Shunfa Gong <sup>a</sup>, Ruirui Wu <sup>a</sup>, Qiuju Han <sup>b</sup>, Degui Kong <sup>a, \*</sup>, Wenzhi Wu <sup>a, \*\*</sup>

<sup>a</sup> School of Electronic Engineering, Heilongjiang University Harbin, Heilongjiang, 150080, China

<sup>b</sup> School of Arts and Sciences, Northeast Agricultural University Harbin, Heilongjiang, 150030, China

\* Corresponding author's E-mail: [kongdegui@hlju.edu.cn](mailto:kongdegui@hlju.edu.cn) and [wuwenzhi@hlju.edu.cn](mailto:wuwenzhi@hlju.edu.cn)

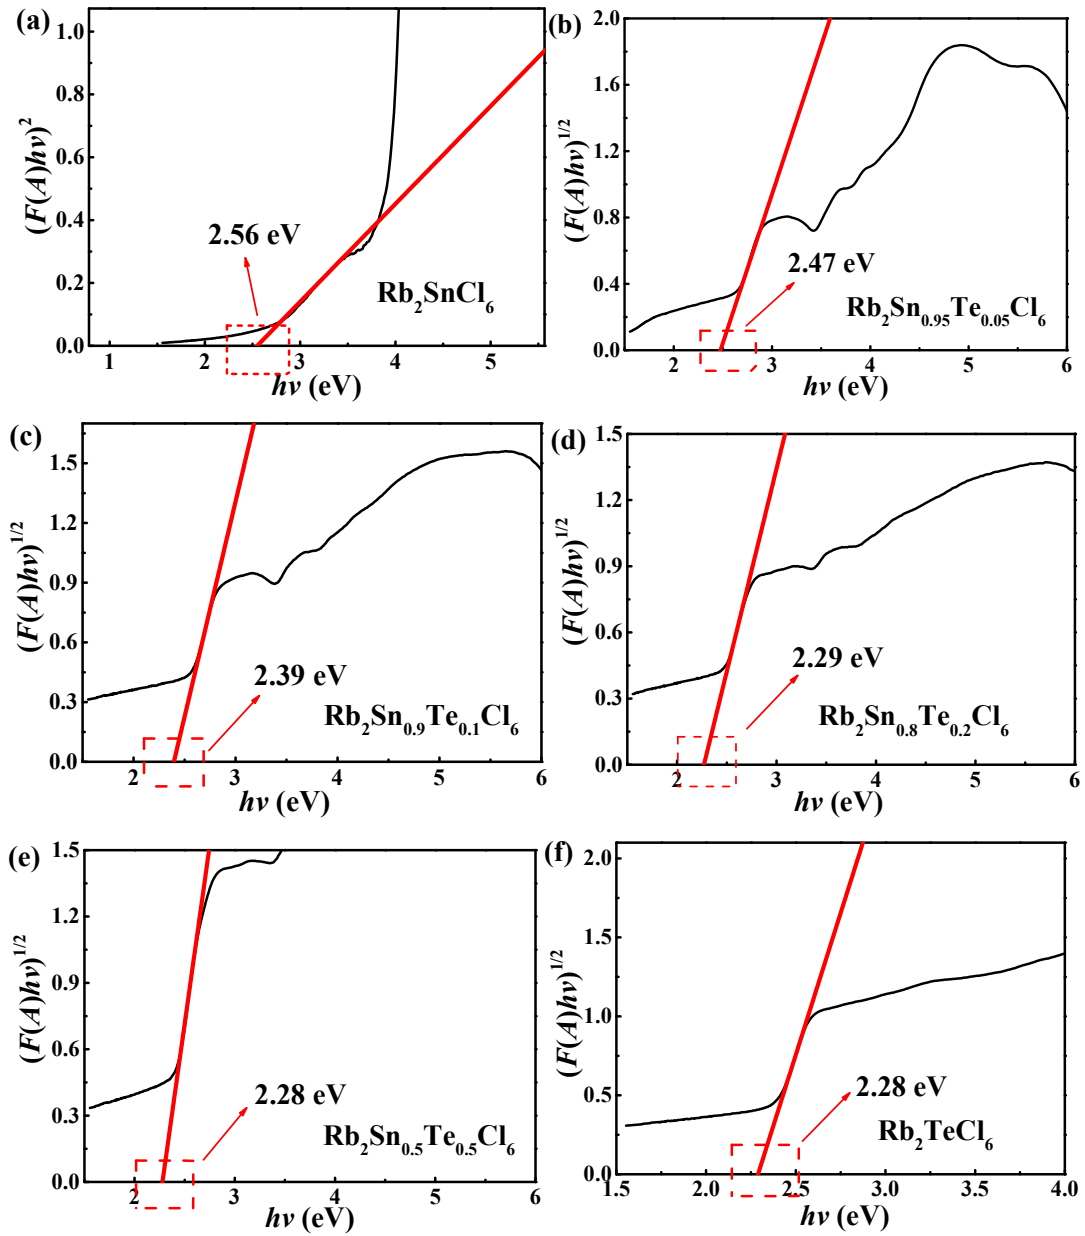

**Figure S1** The optical band gap is calculated by the Tauc-plot formula based on the absorption spectra. the band gap obtained of (a)  $Rb_2SnCl_6$  MCs, (b)  $Rb_2Sn_{0.95}Te_{0.05}Cl_6$  MCs, (c)  $Rb_2Sn_{0.9}Te_{0.1}Cl_6$  MCs, (d)  $Rb_2Sn_{0.8}Te_{0.2}Cl_6$  MCs, (e)  $Rb_2Sn_{0.5}Te_{0.5}Cl_6$  MCs (f)  $Rb_2TeCl_6$  MCs.

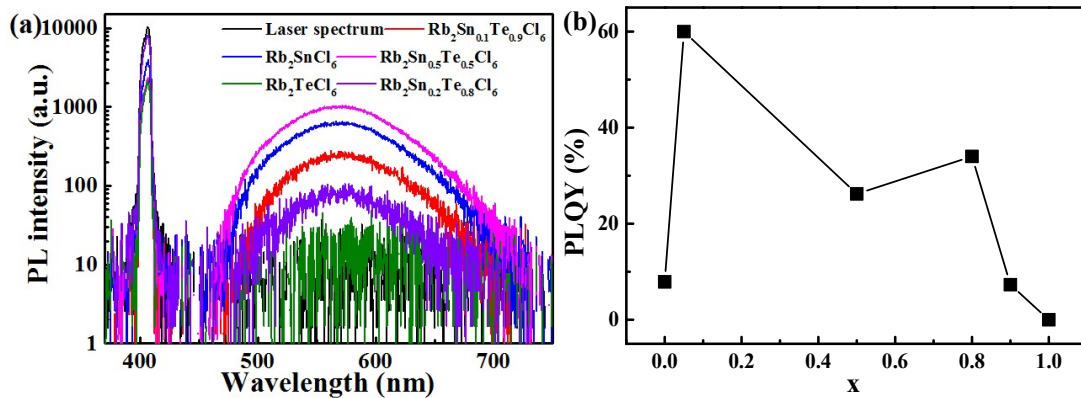

**Figure S2** PLQY with x values changing

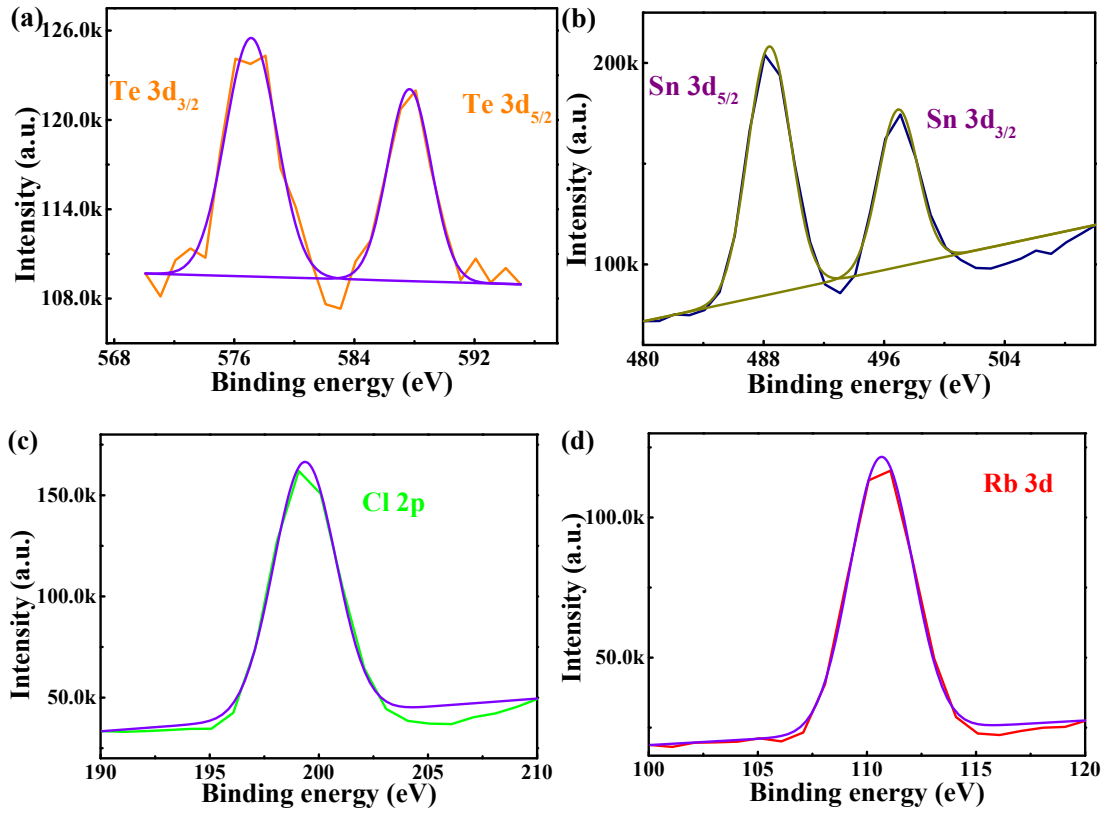

Figure S3 The XPS spectra of (a) Te 3d. (b) Sn 3d. (c) Cl 2p. (d) Rb 3d

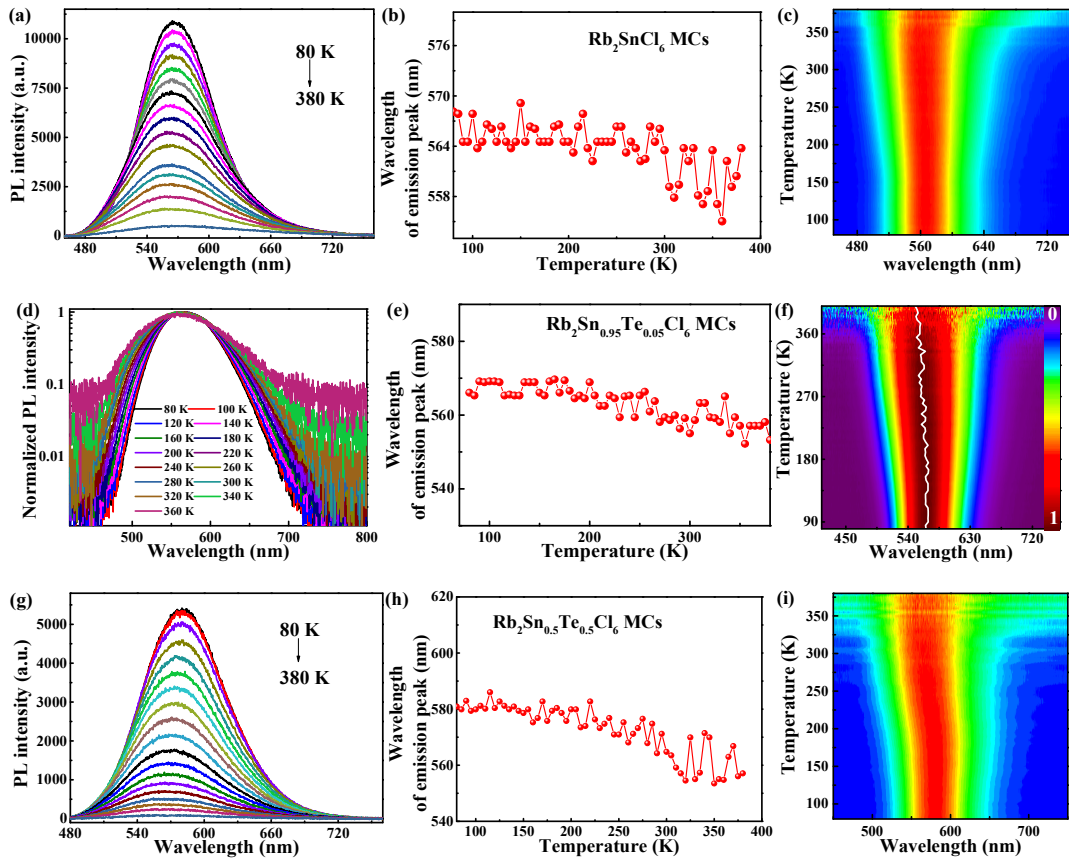

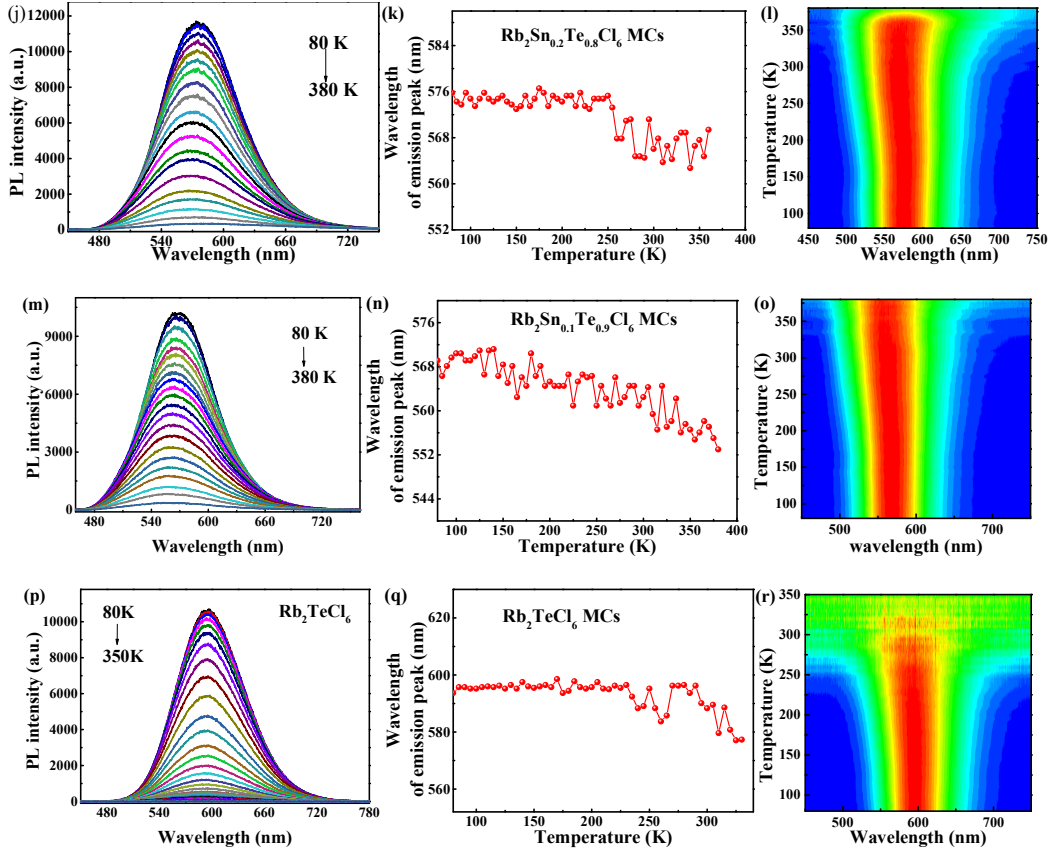

**Figure S4** PL spectra, temperature dependence of emission peak wavelength and The normalized PL pseudocolor map of (a-c) Rb<sub>2</sub>SnCl<sub>6</sub>, (d-f) Rb<sub>2</sub>Sn<sub>0.95</sub>Te<sub>0.05</sub>Cl<sub>6</sub>, (g-i) Rb<sub>2</sub>Sn<sub>0.5</sub>Te<sub>0.5</sub>Cl<sub>6</sub> (j-l) Rb<sub>2</sub>Sn<sub>0.2</sub>Te<sub>0.8</sub>Cl<sub>6</sub> (m-o) Rb<sub>2</sub>Sn<sub>0.1</sub>Te<sub>0.9</sub>Cl<sub>6</sub> (p-r) Rb<sub>2</sub>TeCl<sub>6</sub> MCs at 80-380 K.

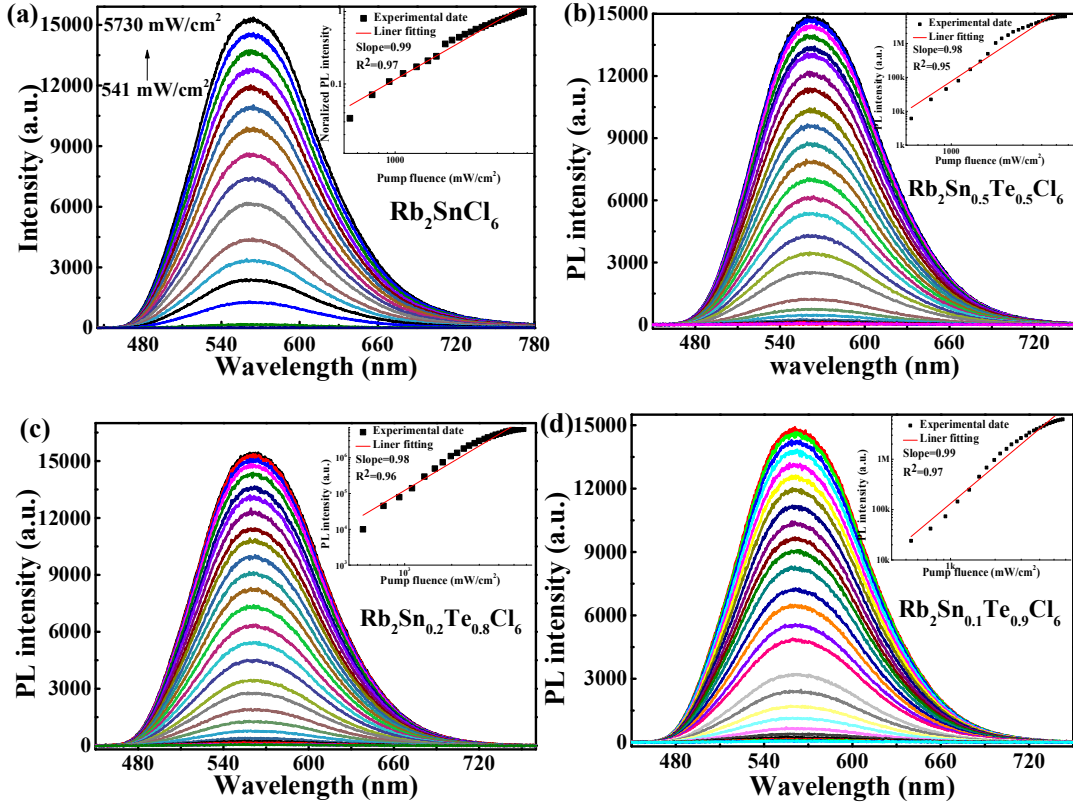

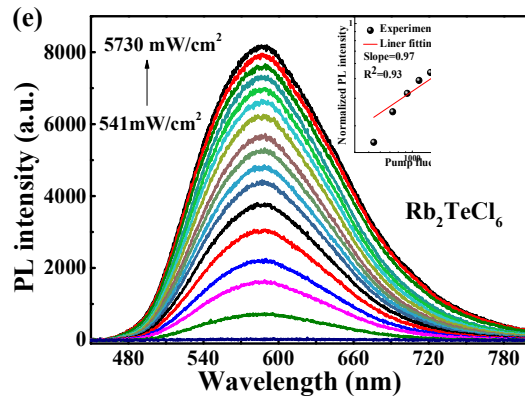

**Figure S5** PL spectra of (a)  $\text{Rb}_2\text{SnCl}_6$  (b)  $\text{Rb}_2\text{Sn}_{0.1}\text{Te}_{0.9}\text{Cl}_6$  (c)  $\text{Rb}_2\text{Sn}_{0.2}\text{Te}_{0.8}\text{Cl}_6$  (d)  $\text{Rb}_2\text{Sn}_{0.5}\text{Te}_{0.5}\text{Cl}_6$  (e)  $\text{Rb}_2\text{TeCl}_6$  MCs at 405 nm CW laser at different pump fluence under 80 K, and the insets are the linear fitting between PL intensity and pump fluence

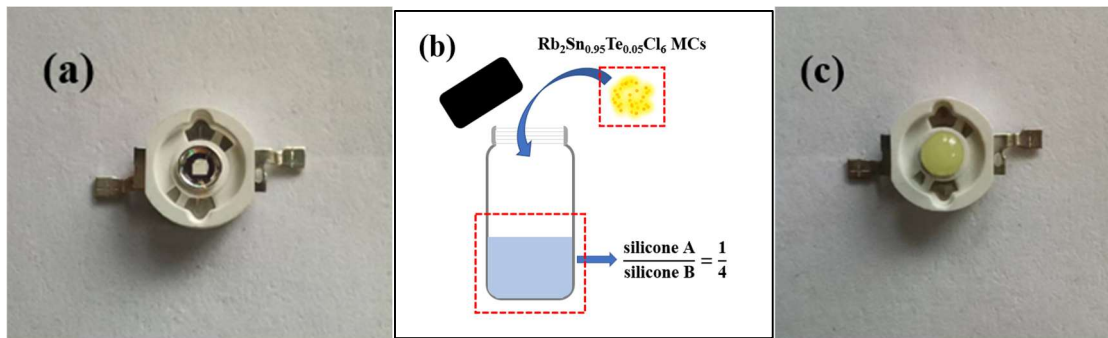

**Figure S6** (a) The LED chip without coating  $\text{Rb}_2\text{Sn}_{0.95}\text{Te}_{0.05}\text{Cl}_6$  MCs (b) The way prepares the mixture of the light-transmitting encapsulating silica gel A and the light-shading encapsulating silica gel B and  $\text{Rb}_2\text{Sn}_{0.95}\text{Te}_{0.05}\text{Cl}_6$ . (c) The LED chip with coating  $\text{Rb}_2\text{Sn}_{0.95}\text{Te}_{0.05}\text{Cl}_6$  MCs.
